# Supplementary material
Source: PubMed Central journal article supplement (PMC3396556)
Supplement: NIHMS385112-supplement-supplement_1.pdf [file NIHMS385112-supplement-supplement_1.pdf]

# Supplemental Material

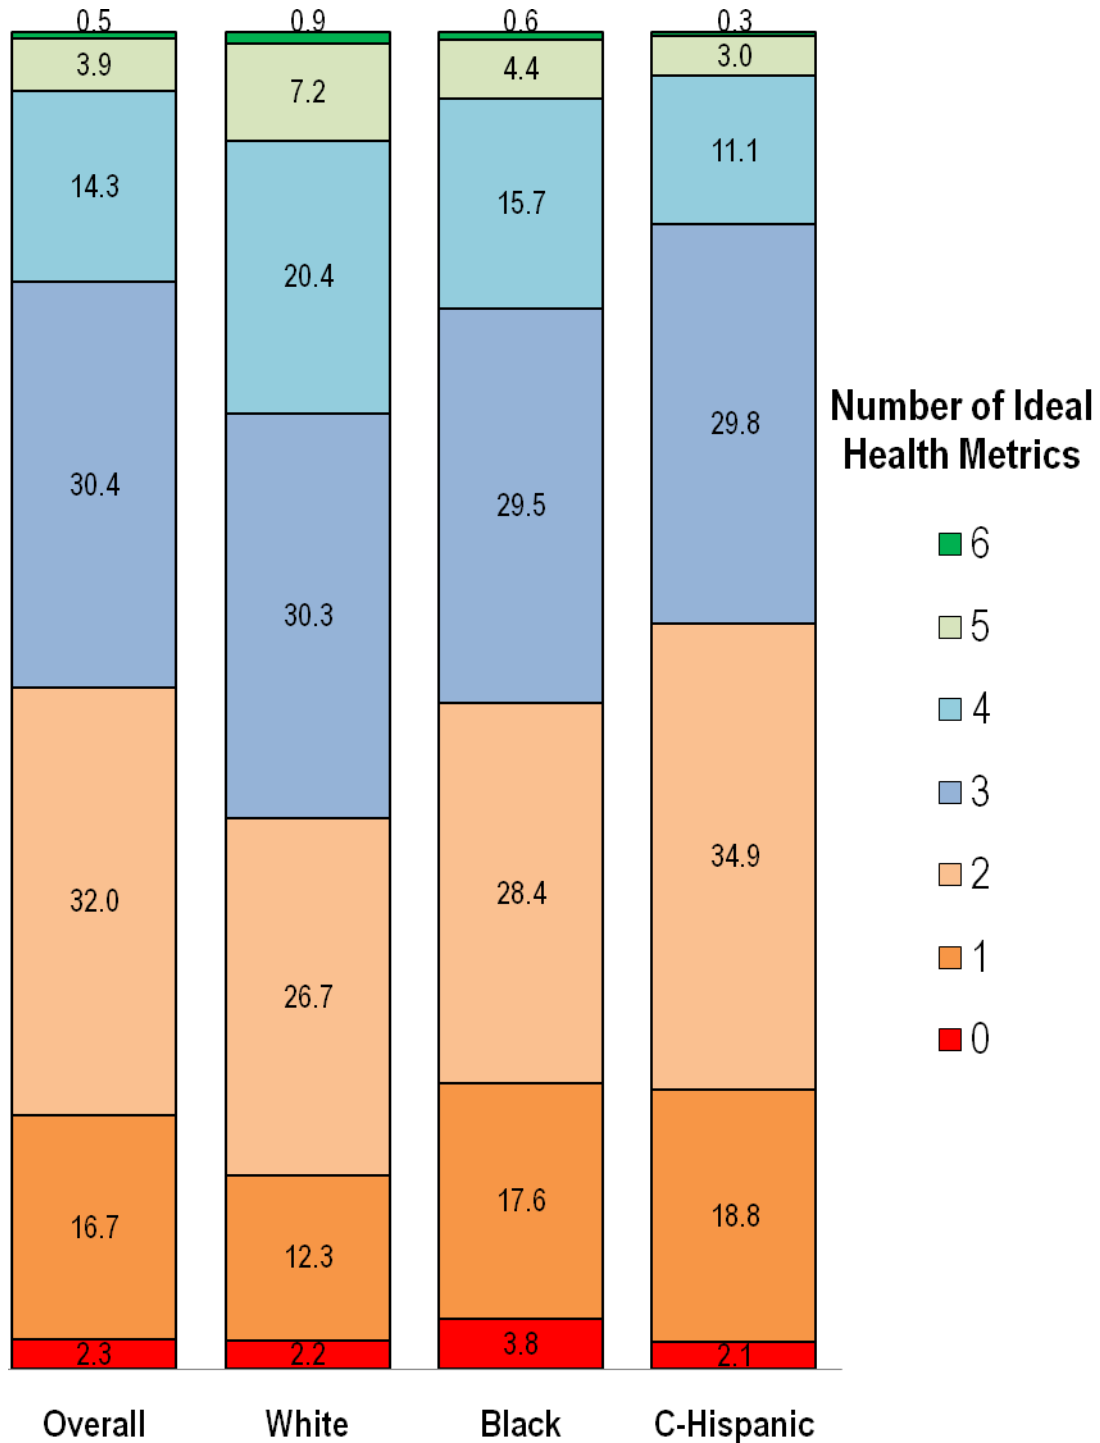

**Supplemental Figure 1.** Overall and age- and sex- adjusted prevalence (%) of ideal cardiovascular health in white, black and Caribbean Hispanic (C-Hispanic) subgroups according to the number of ideal health metrics.

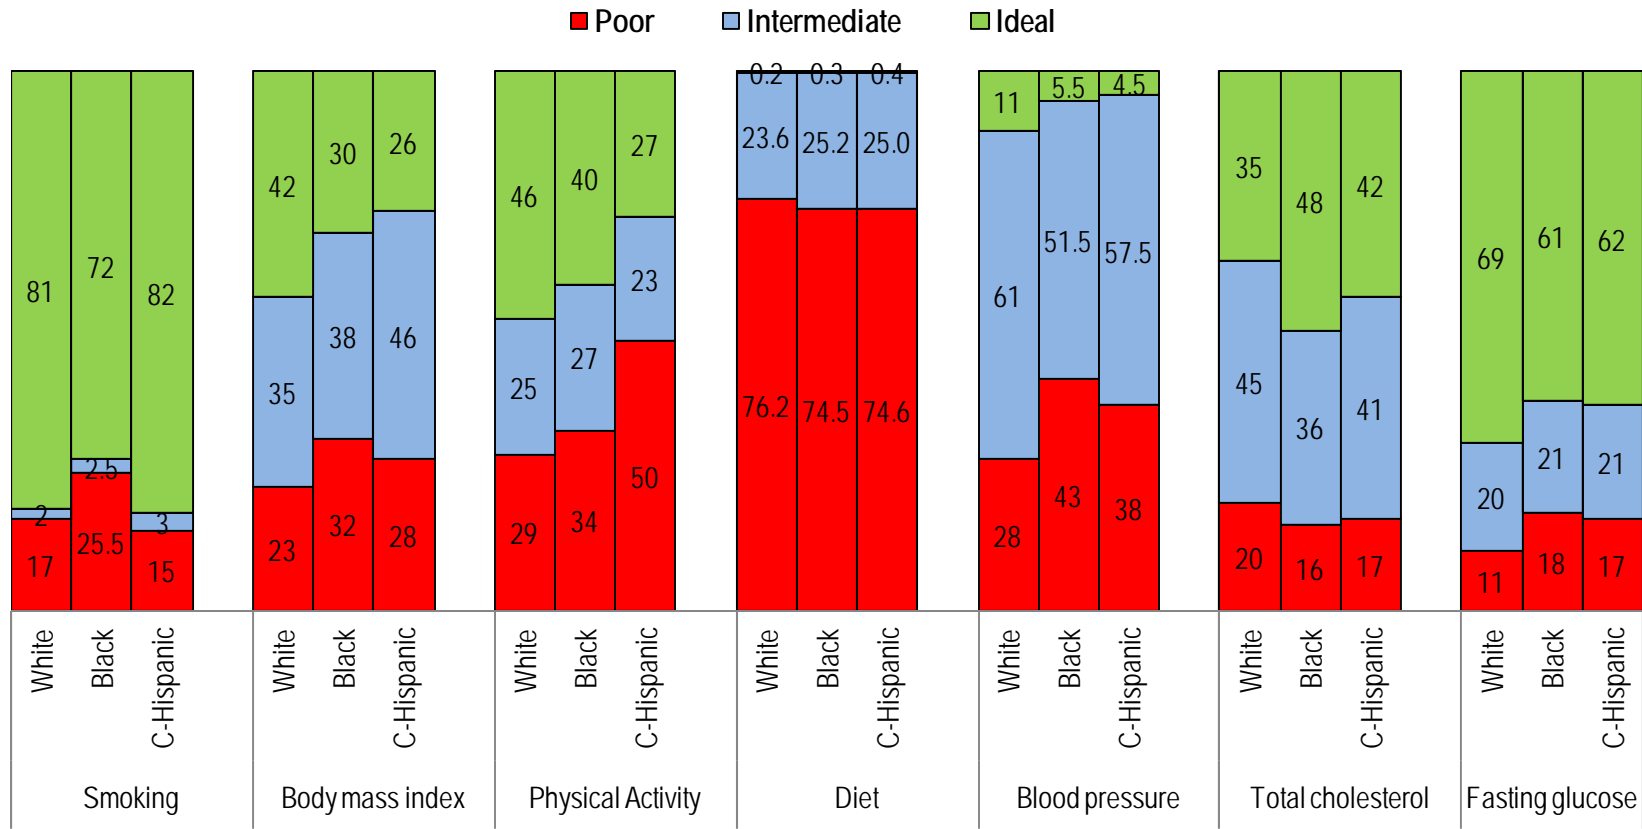

**Supplemental Figure 2.** Age and sex-adjusted prevalence (%) of ideal, intermediate and poor cardiovascular metrics in white, black and Caribbean Hispanic (C-Hispanic) subgroups.
